# Supplementary material for: Bin(Tu)xCl3n: a novel sensitizer and its enhancement of BiOCl nanosheets’ photocatalytic activity
Source: Royal Society of Chemistry journal article supplement (doi:10.1039/c2jm16829d), 2012-01-01
Supplement: c2jm16829d.pdf [file c2jm16829d.pdf]

Supporting Materials for:

**$\text{Bi}_n(\text{Tu})_x\text{Cl}_{3n}$ : a novel sensitizer and its enhancement of BiOCl  
nanosheets' photocatalytic activity**

Liqun Ye,<sup>a</sup> Chuqing Gong,<sup>a</sup> Jinyan Liu,<sup>a</sup> Lihong Tian,<sup>a</sup> Tianyou Peng,<sup>a</sup> Kejian Deng,<sup>b</sup> and

Ling Zan<sup>\*a</sup>

<sup>a</sup> *College of Chemistry and Molecular Science, Wuhan University, Wuhan 430072,  
People's Republic of China*

<sup>b</sup> *Key Laboratory of Catalysis and Materials Science of the State Ethnic Affairs  
Commission and Ministry of Education, South-Central University for Nationalities,  
Wuhan 430074, People's Republic of China*

---

\* Corresponding author. Tel.: 86 27 6875 2919; fax: 86 27 8737 8727; E-mail: irlab@whu.edu.cn

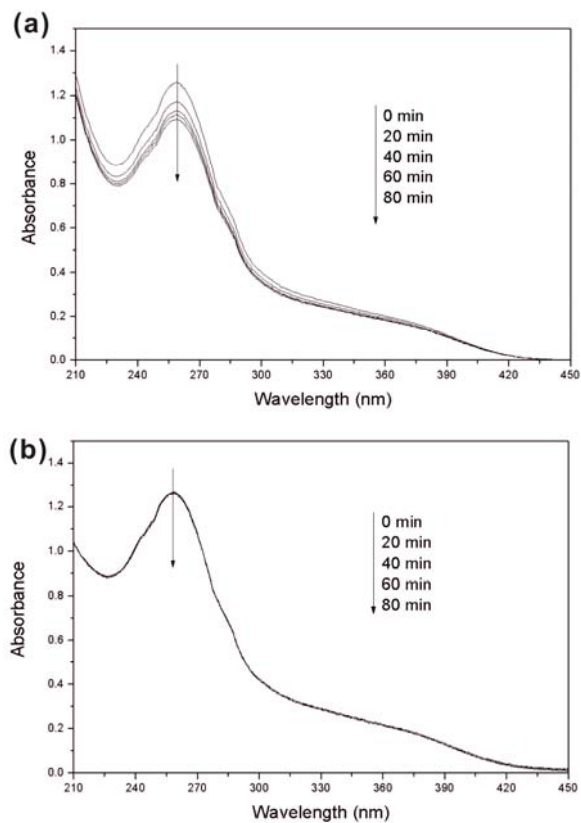

**Fig. S1.** UV-Vis absorption spectra of NBT in common suspension: (a) BiOCl-3-7; and (b) common BiOCl.

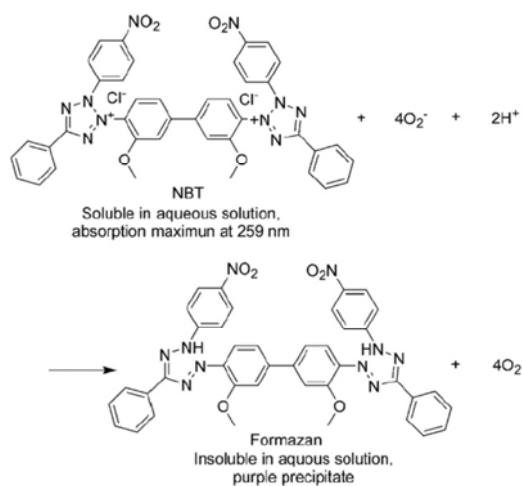

**Fig. S2.** Reaction of NBT with superoxide ion.

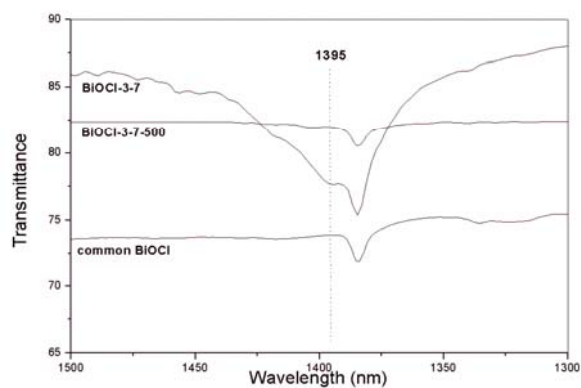

**Fig. S3.** (a) FT-IR spectra of common BiOCl, BiOCl-3-7-500 and BiOCl-3-7 ( $1300\text{ cm}^{-1}$  -  $1500\text{ cm}^{-1}$ )

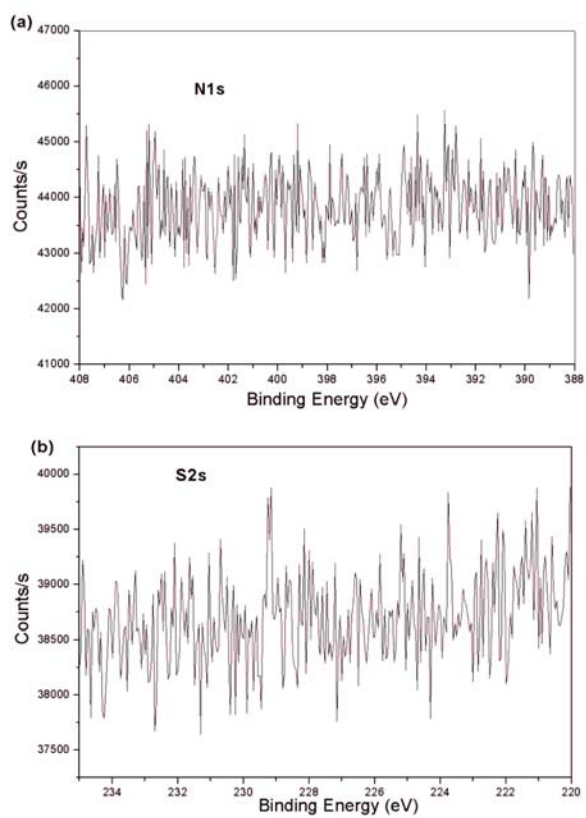

**Fig. S4.** XPS spectrum of BiOCl-3-7: (a) N1s; (b) S2s.

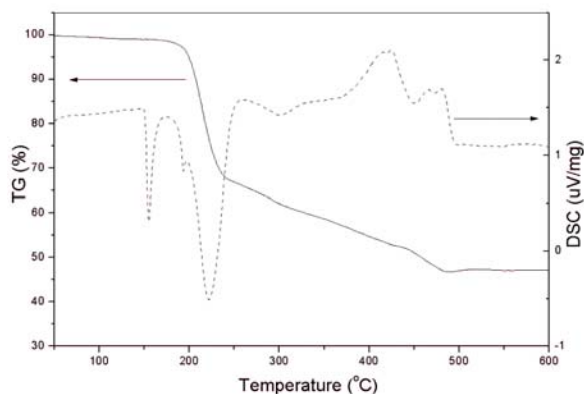

**Fig. S5.** TG-DSC curves of BTC-3.

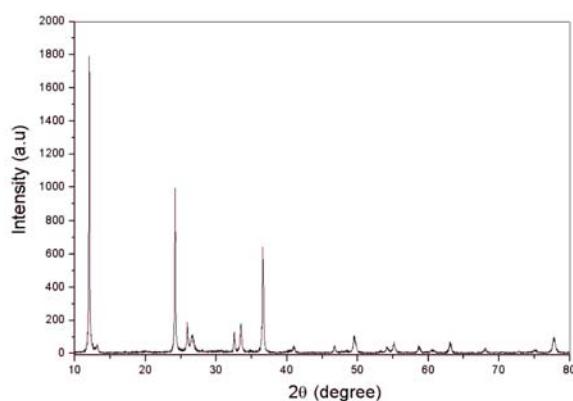

**Fig. S6.** XRD pattern of BTC-3-500.

The TG-DSC of BTC-3 was showed in Fig. S4. At 500 °C, the rate of weight losses estimated on 47.1% which in accordance with that of BiOCl (47.9%). Furthermore, the XRD pattern displayed that BTC-3-500 (Fig. S5) is BiOCl. Those results indicate that BTC can be transformed to BiOCl at 500°C, and the slight BTC can be removed completely by heat treatment at 500°C. So, BiOCl-3-7-500 can be used as referential sample without BTC.

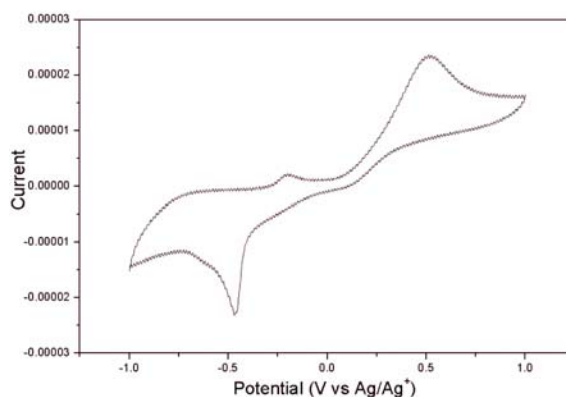

**Fig. S7.** CV curves of BTC-3.

The CV curves of the BTC-3 (Fig. S6) was recorded on an u-Autolab III electrochemical analyzer using glassy carbon disks as the working electrode, a Pt-wire auxiliary electrode and Ag/0.01 M AgNO<sub>3</sub> + 0.1 M tetrabutylammonium hexafluorophosphate (TBAPF<sub>6</sub>) acetonitrile (0.1 M) reference electrode. A drop of the BTC-3 anhydrous acetonitrile solution was placed on the surface of the working electrode and then the solvent was removed to form a BTC-3 film. The scan rate was set at 20 mV/s and the electrolytes were thoroughly deoxygenated by bubbling with high-purity argon for 15 min.

Then the VB/CB band energy was calculated from these  $E'_{ox}$  and  $E'_{ed}$  values.  $E_{VB}(E_{HOMO}) = E_{onset(ox)} - E_{FOC} + 0.3 \text{ eV}$ ;  $E_{CB}(E_{LUMO}) = E_{HOMO} - E_g^{opt} \text{ (eV)}$ . Assuming the energy level of ferrocene/ferrocenium (Fc/Fc<sup>+</sup>) to be -0.3 eV below the hydrogen electrode level. The formal potential of Fc/Fc<sup>+</sup> was measured to be 0.071 eV against an Ag/Ag<sup>+</sup> reference electrode. And  $E_g^{opt} = 1240/\lambda_{onset} = 1240/556 = 2.2 \text{ eV}$ ;  $E_{onset(ox)} = 0.363 \text{ eV}$  (relative to the Ag/Ag<sup>+</sup> reference electrode). Therefore,  $E_{VB}(E_{HOMO}) = 0.363 - 0.071 + 0.3 = 0.6 \text{ eV}$ ;  $E_{CB}(E_{LUMO}) = 0.6 - 2.2 = -1.6 \text{ eV}$ .

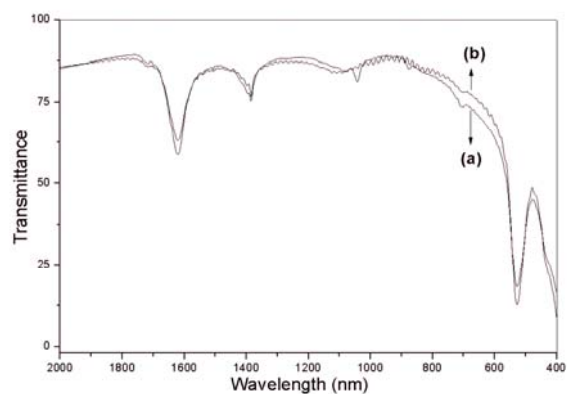

**Fig. S8.** FT-IR spectra of BiOCl-3-7. (a) before PCD process; (b) after five times PCD processes.

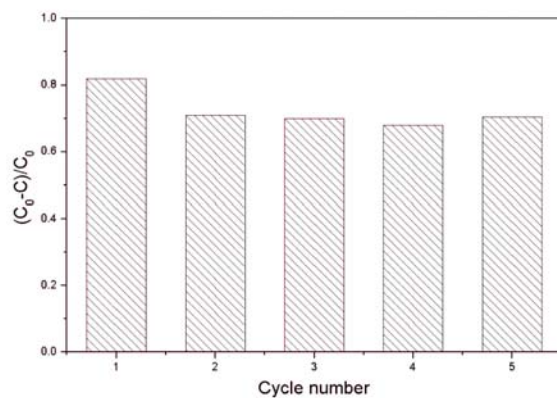

**Fig. S9.** Cycle runs in the photocatalytic degradation of RhB in the presence of BiOCl-3-7 under visible light irradiation for 1 h.
